# Supplementary material
Source: PubMed Central journal article supplement (PMC3348402)
Supplement: NIHMS351899-supplement-01.pdf [file NIHMS351899-supplement-01.pdf]

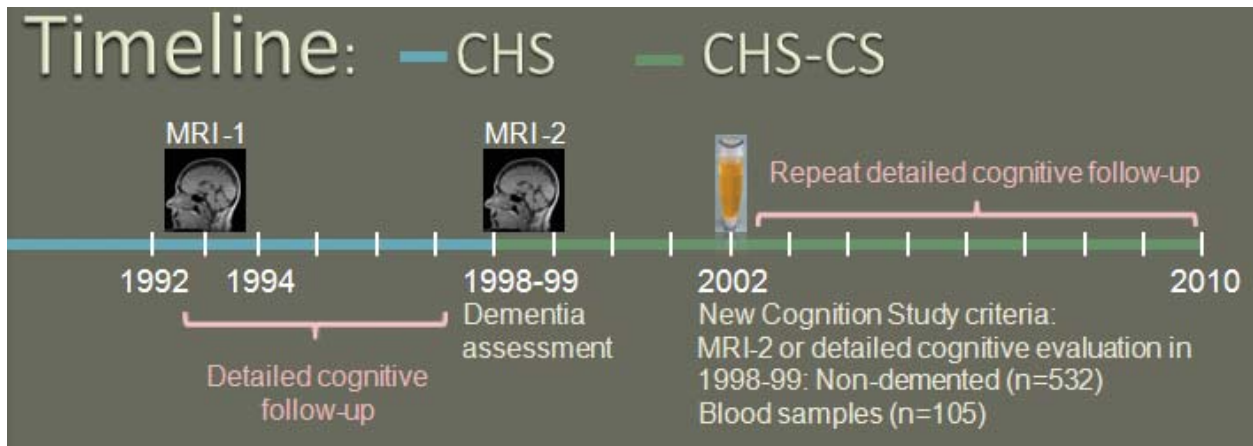

Supplementary Figure 1. Timeline of CHS-CS and oxysterol sample

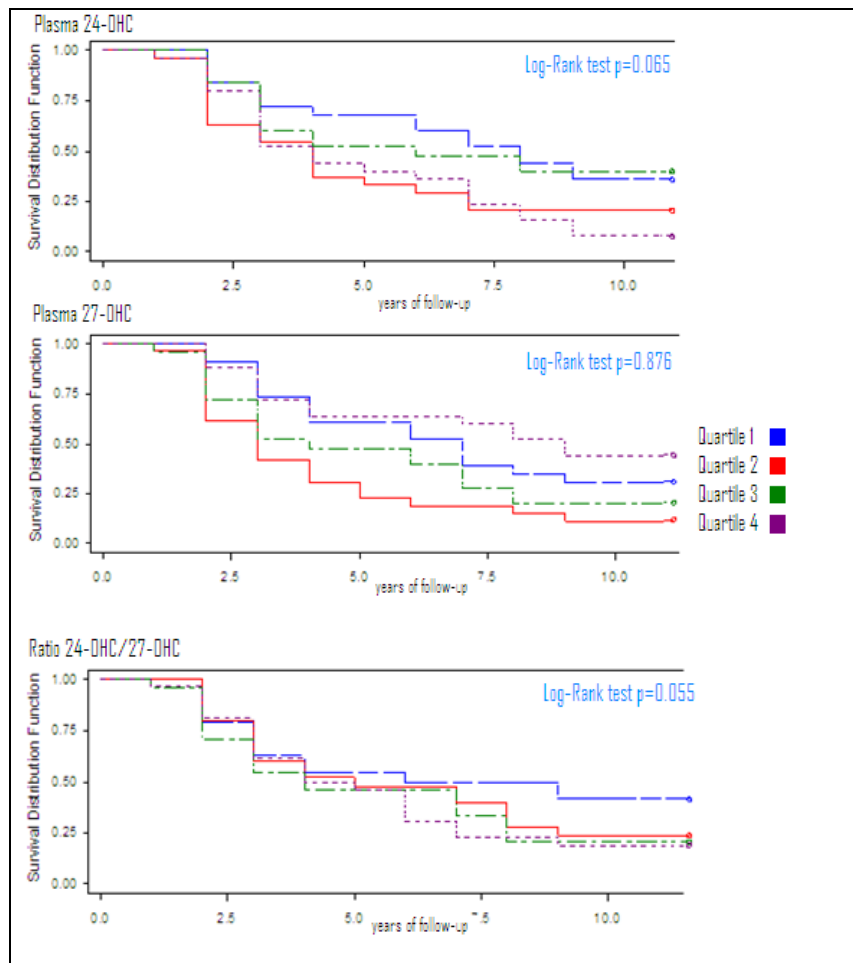

Supplementary Figure 2. Kaplan-Meier survival curves for time to cognitive impairment by plasma 24-OHC, 27-OHC and ratio 24-OHC/27-OHC
